# Supplementary material for: Pitch-based carbon/nano-silicon composite, an efficient anode for Li-ion batteries
Source: Royal Society of Chemistry journal article supplement (doi:10.1039/c9ra00437h), 2019-01-01
Supplement: c9ra00437h1.pdf [file c9ra00437h1.pdf]

## Improvement of cycling performance of a pitch-based carbon/nano-silicon matrix anode for Li-ion batteries

Angel Manuel Escamilla-Pérez<sup>a,\*</sup>, Aude Roland<sup>a</sup>, Sophie Giraud<sup>a</sup>, Céline Guiraud<sup>a</sup>, Héloïse Virieux<sup>b</sup>,  
Kévin Demoulin<sup>b</sup>, Yohan Oudart<sup>b\*</sup>, Nicolas Louvain<sup>a,c</sup>, Laure Monconduit<sup>a,c</sup>

<sup>a</sup>Institut Charles Gerhardt Montpellier, CNRS UMR 5253, Univ. Montpellier, 34095 Montpellier, France

<sup>b</sup>Nanomakers, 1 rue de Clairefontaine, 78120 Rambouillet, France

<sup>c</sup>Réseau sur le Stockage Electrochimique de l'Energie (RS2E), CNRS FR3459, 33 Rue Saint Leu, 80039 Amiens, Cedex, France

\*Corresponding authors

e-mail addresses: youdart@nanomakers.fr; laure.monconduit@umontpellier.fr

### Supplementary Information

TEM of the Si nano-particles with and without carbon coating

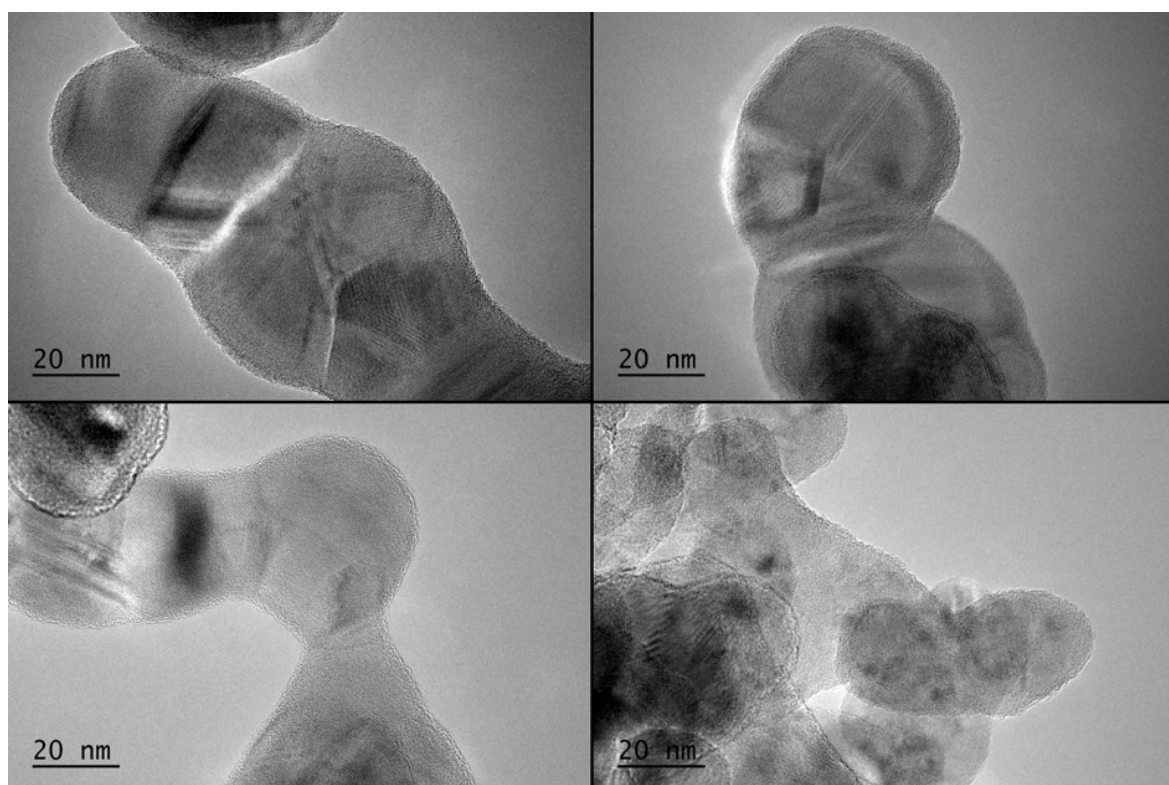

Fig. S1-a TEM images of Si<sub>40</sub>C carbon coated particles

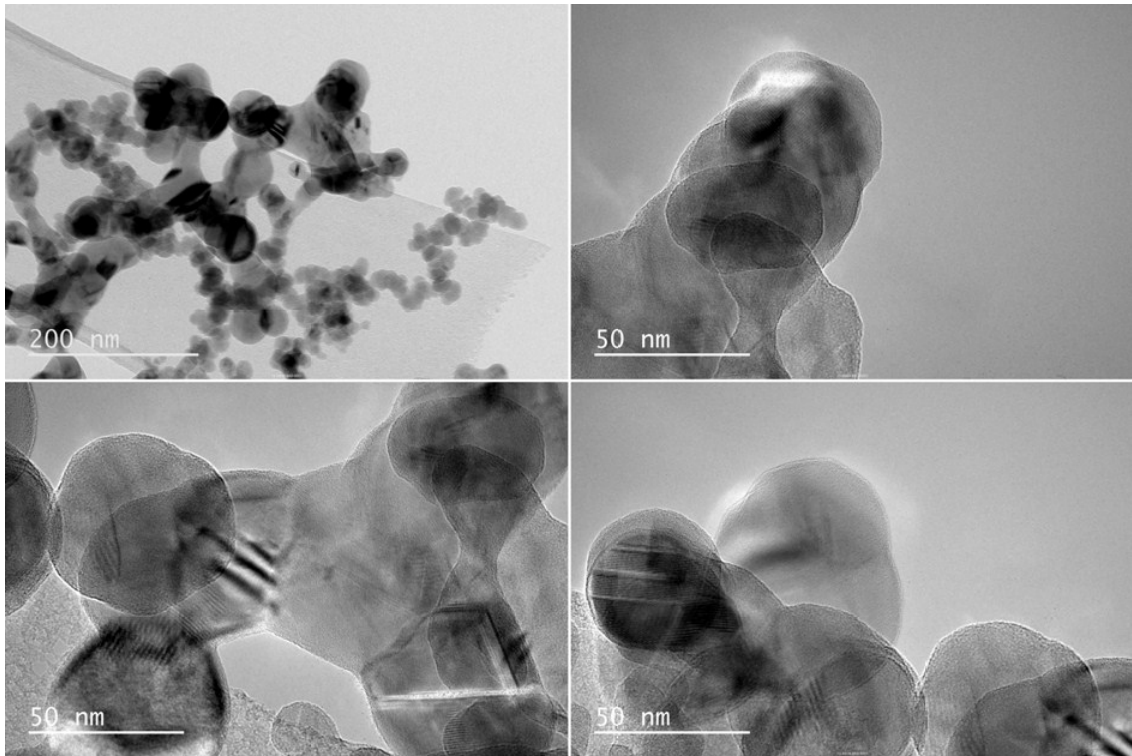

Fig. S1-b TEM images of Si<sub>40</sub> uncoated particles

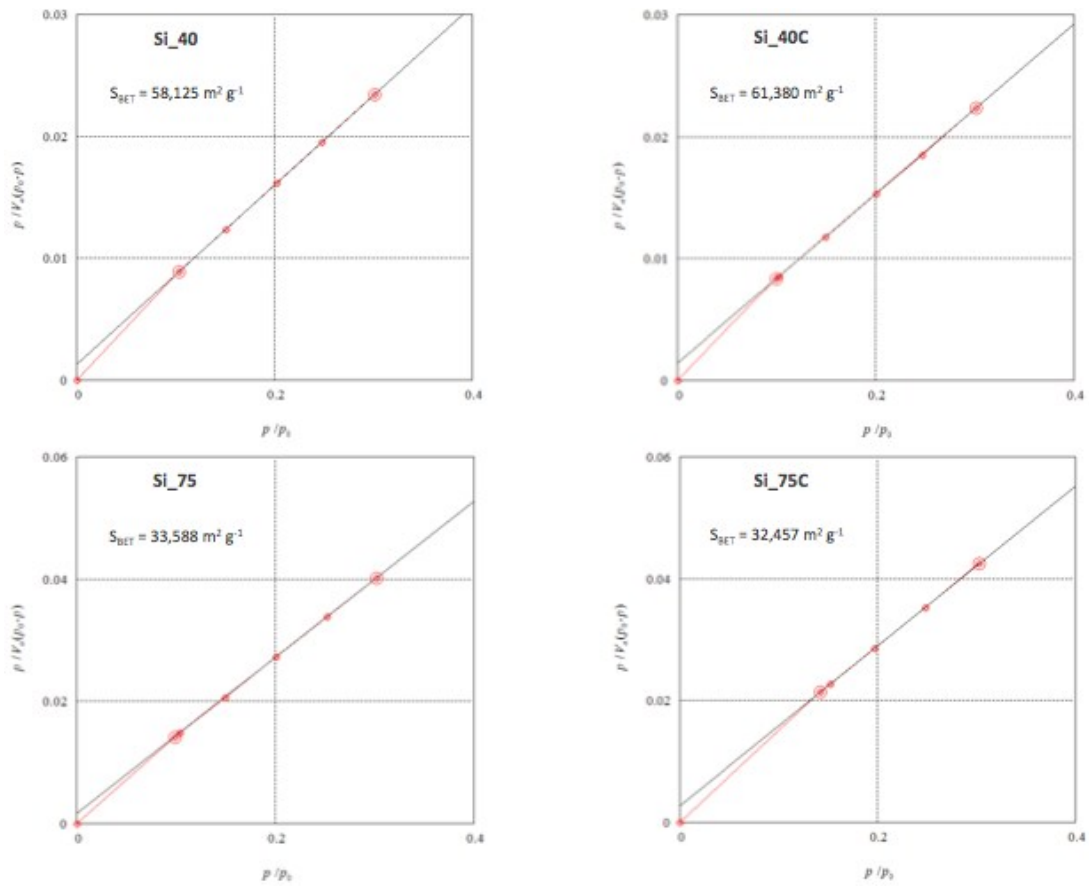

Fig. S2: BET plots of the different types of Si particles (adsorptive N<sub>2</sub>, adsorption temperature at 77K)

The particle size was deduced from those BET measurements using the following formula:

$d \text{ (nm)} = 6000 / S_{\text{BET}} \text{ (m}^2 \text{ g}^{-1}) * \rho \text{ (g cm}^{-3})$  with  $\rho = 2,30 \text{ g cm}^{-3}$  for these silicon nanoparticles

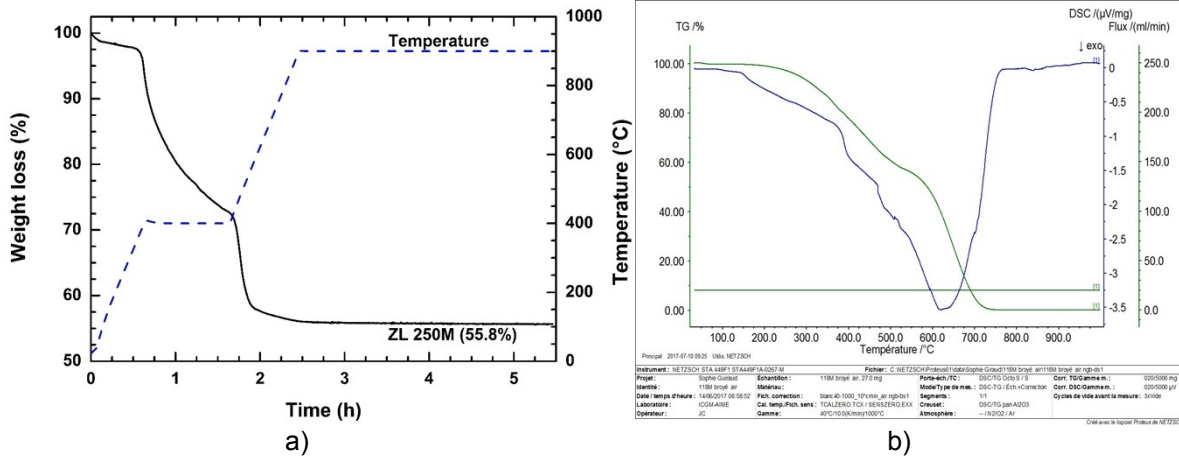

Fig. S3 TGA of a) ZL 250M under N<sub>2</sub> (heating rate 10 °C min<sup>-1</sup>) and b) of 118M under air (heating rate 10 °C min<sup>-1</sup>)

Calculations:

For a composite prepared with 100mg of Si and 1.285g of ZL250M, due to the weight loss of ZL250M at 900°C (44.2%), the stoichiometry in Si can be estimated to be  $0.1 / (0.1 + 0.558 \times 1.285) = 12.2\% \text{ wt}$ .

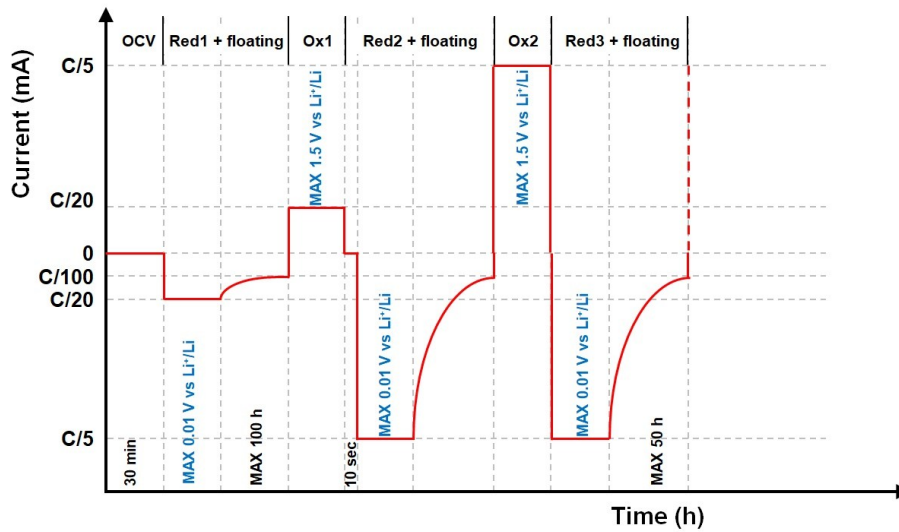

Fig. S4 Cycling conditions for electrochemical galvanostatic measurements

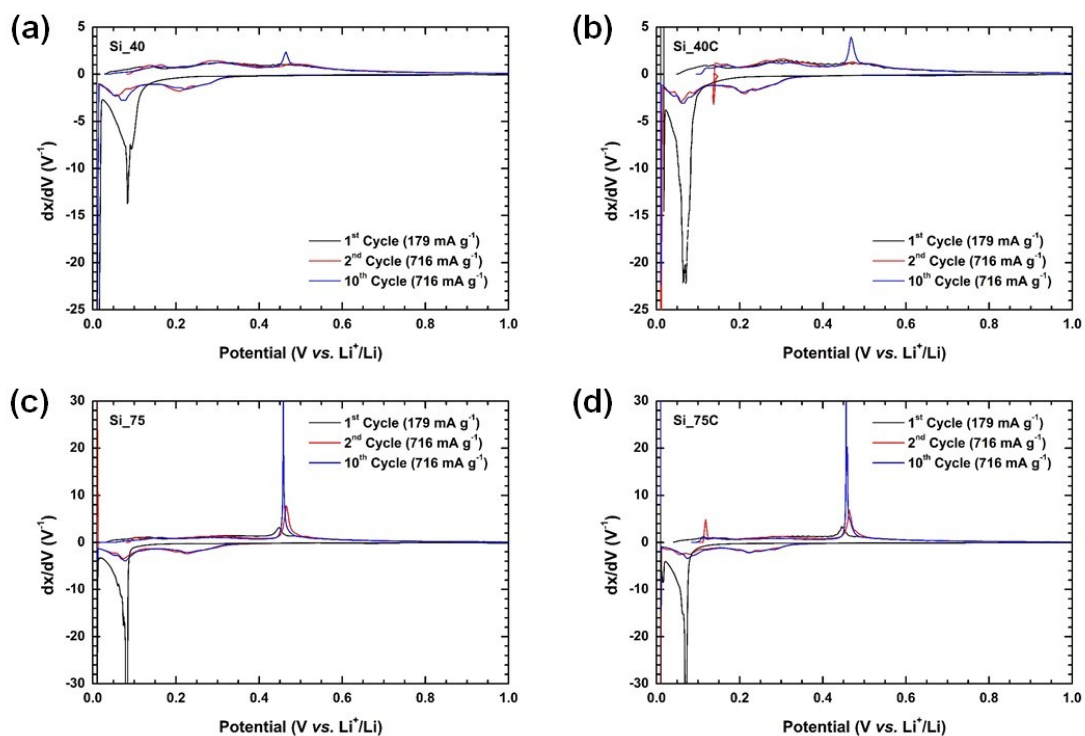

Fig. S5 First derivative of the charge/discharge profiles of the silicon nanoparticles at a current rate of 179  $\text{mA.g}^{-1}$  (1<sup>st</sup> cycle) and at a current rate of 716  $\text{mA.g}^{-1}$  (2<sup>nd</sup> and 10<sup>th</sup> cycles) for a voltage window of 0.01-1.5 V vs.  $\text{Li}^+/\text{Li}$ ; Si\_40 (a), Si\_40C (b), Si\_75 (c) and Si\_75C (d)

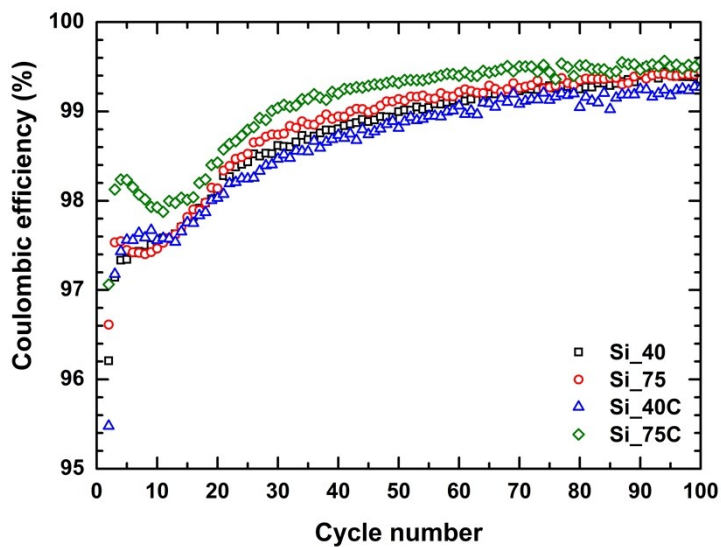

Fig. S6 Coulombic efficiency of carbon-coated and uncoated silicon nanoparticles at a current density of 716  $\text{mA.g}^{-1}$  (179  $\text{mA.g}^{-1}$  for the 1<sup>st</sup> cycle). Voltage window of 0.01-1.5 V vs.  $\text{Li}^+/\text{Li}$ .

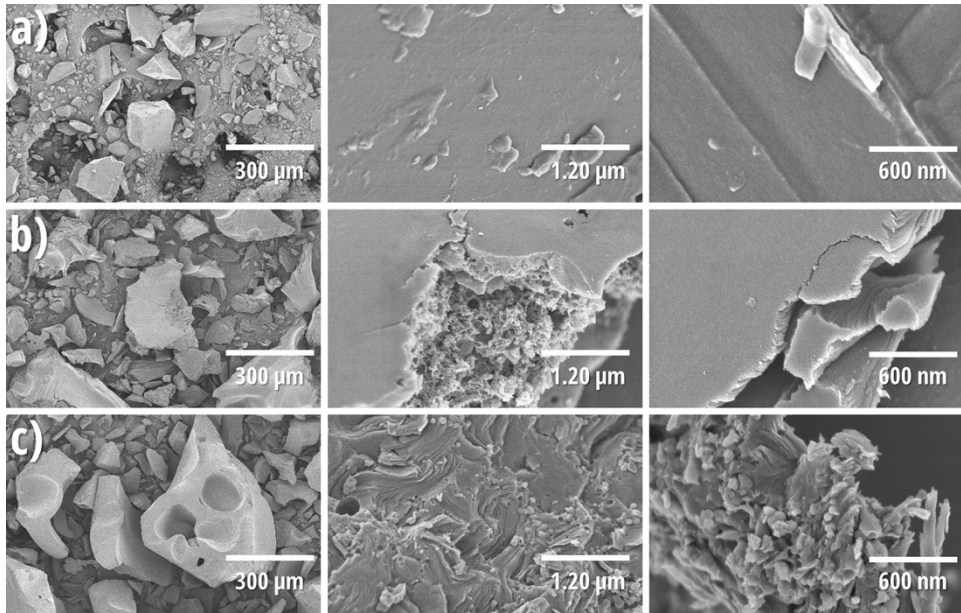

Fig. S7 Scanning electron micrographs of ZL 118M (a), \_118M (b) and Si\_75C\_118M (c) at different magnifications

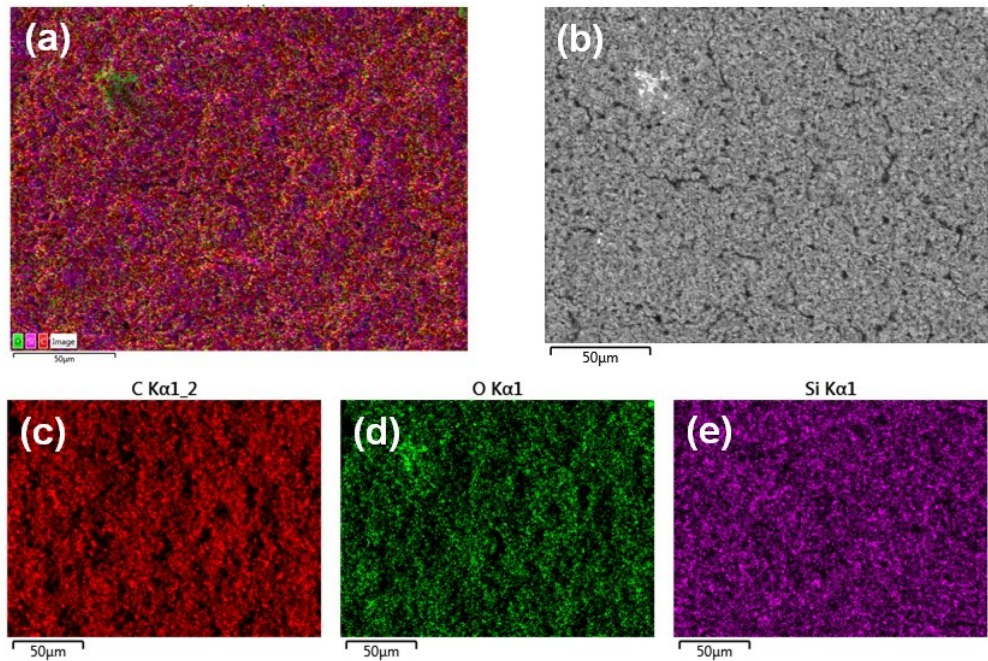

Fig. S8 SEM-EDX mapping micrographs of the Si\_75C\_118M electrodes; superposed micrograph (a), secondary electron micrograph (b), carbon mapping (c), oxygen mapping (d) and silicon mapping (e)

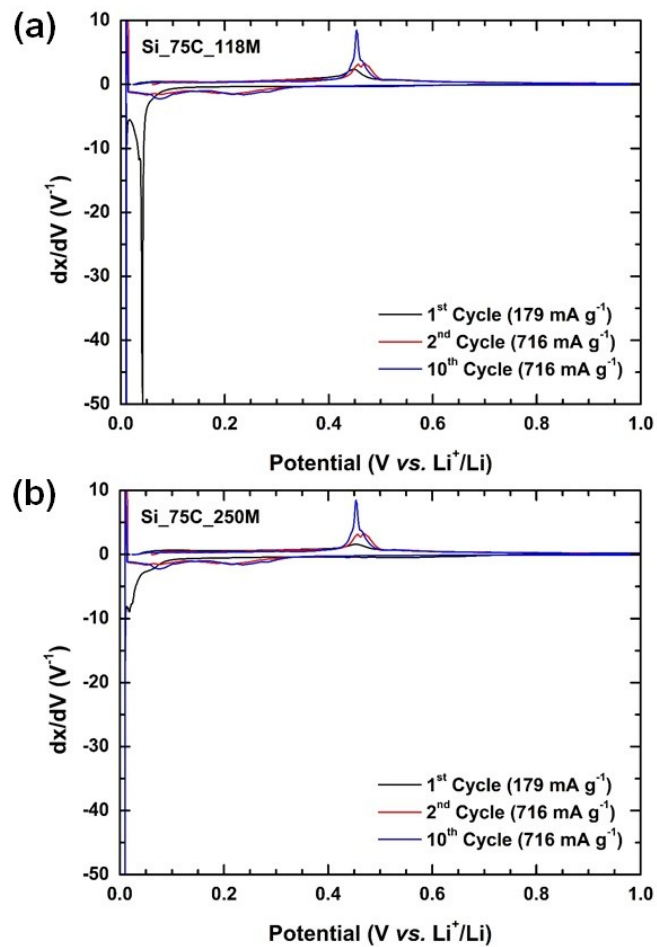

Fig. S9 First derivative of the charge/discharge profiles of the Si\_75C-based composites using the two types of pitches; Si\_75C\_118M (a) and Si\_75C\_250M (b) at a current rate of  $716\text{ mA.g}^{-1}$  ( $179\text{ mA.g}^{-1}$  for the 1<sup>st</sup> cycle). Voltage window of 0.01-1.5 V vs.  $Li^+/Li$

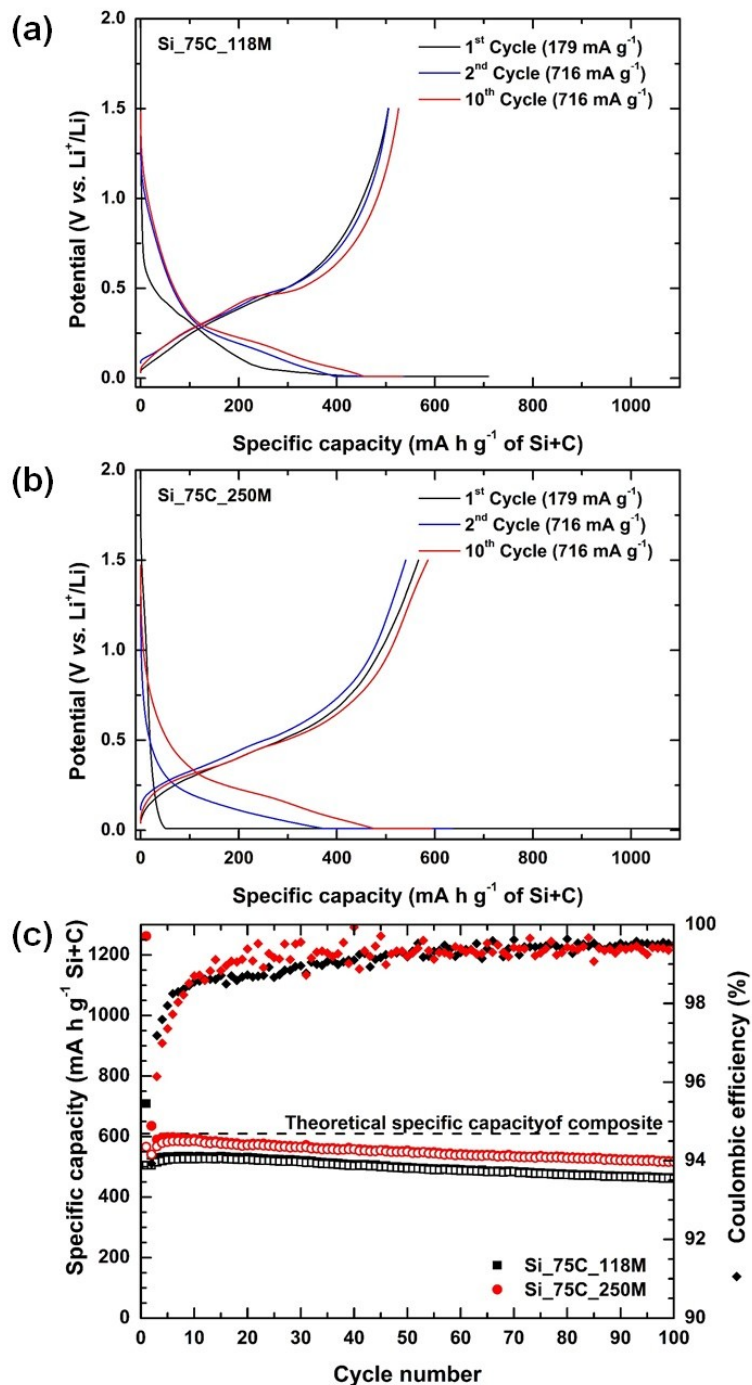

Fig. S10 Charge/discharge profiles of the Si<sub>75</sub>C-based composites ball-milled for 1h for electrode formulation using the two types of pitches; Si<sub>75</sub>C<sub>118</sub>M (a) and Si<sub>75</sub>C<sub>250</sub>M (b); and their cycling performances and coulombic efficiency (c) at a current rate of 716 mA.g<sup>-1</sup> (179 mA.g<sup>-1</sup> for the 1<sup>st</sup> cycle). Voltage window of 0.01-1.5 V vs. Li<sup>+</sup>/Li. Filled and open symbols refer to reduction (discharge) and oxidation (charge), respectively

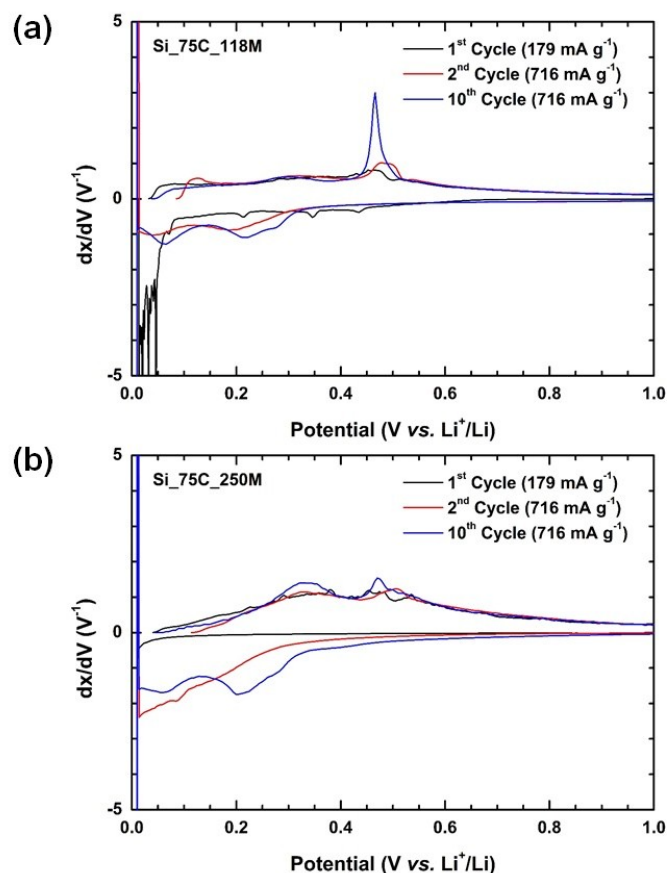

Fig. S11 First derivative of the charge/discharge profiles of the Si<sub>75</sub>C-based composites ball-milled for 1h for electrode formulation using the two types of pitches; Si<sub>75</sub>C<sub>118</sub>M (a) and Si<sub>75</sub>C<sub>250</sub>M (b) at a current rate of 716 mA.g<sup>-1</sup> (179 mA.g<sup>-1</sup> for the 1<sup>st</sup> cycle). Voltage window of 0.01-1.5 V vs.  $Li^+/Li$

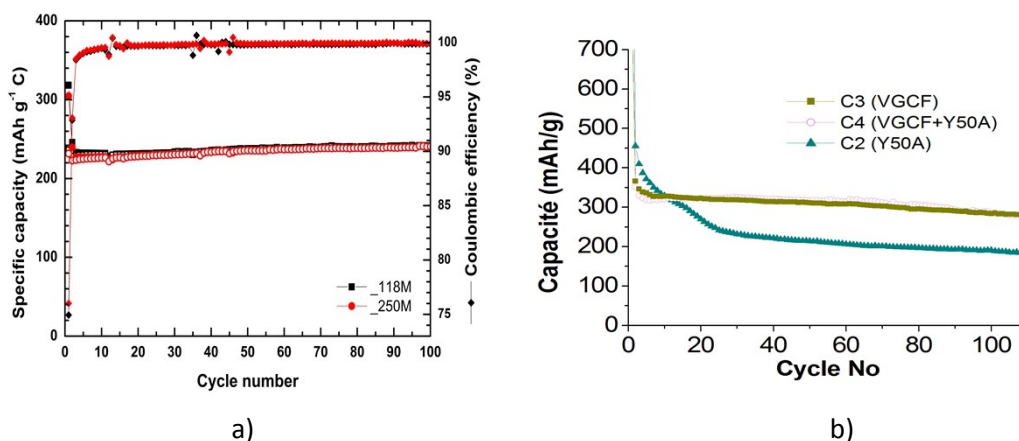

Fig. S12 Cycling performances of a) the 2 pyrolyzed pitches (electrodes without silicon) and their coulombic efficiency at a current density of 716 mA.g<sup>-1</sup> (179 mA.g<sup>-1</sup> for the 1<sup>st</sup> cycle). Voltage window of 0.01-1.5 V vs.  $Li^+/Li$ . Filled and open symbols refer to reduction (discharge) and oxidation (charge), respectively; b) Cycling performances of a) VGCF, CB and VGCF/CB electrodes (without silicon).
